# Supplementary material for: Prognostic Factors in Patients with Sudden Cardiac Arrest and Acute Myocardial Infarction Undergoing Percutaneous Interventions with the LUCAS-2 System for Mechanical Cardiopulmonary Resuscitation
Source: MDPI journal article supplement (doi:10.3390/jcm11133872), 2022-07-04
Supplement: s1 [file s1]

Table S1 (Supplementary Table S1). Patient characteristics and outcomes

| Characteristic                              | Overall group<br><i>n</i> = 71 (100%) | Survivors<br><i>n</i> = 17 (23.9%) | Non-survivors<br><i>n</i> = 54 (76.1%) | <i>p</i> -value |
|---------------------------------------------|---------------------------------------|------------------------------------|----------------------------------------|-----------------|
| Age, years                                  | 71.7 ± 12                             | 69.7 ± 11                          | 72.1 ± 11                              | 0.8             |
| Gender, males                               | 44 (62%)                              | 14 (82%)                           | 30 (56%)                               | 0.1             |
| LVEF, %                                     | 49.8 ± 36                             | 48.1 ± 35.2                        | 64.5 ± 51.6                            | 0.8             |
| <b>Myocardial infarction type</b>           |                                       |                                    |                                        |                 |
| NSTEMI/STEMI/unknown, (N, (%))              | 13,(18)/31(44)/27(38)                 | 2(12)/2(12)/13(76)                 | 11(20)/29(54)/14(26)                   | 0.0007          |
| <b>Onset of cardiac arrest</b>              |                                       |                                    |                                        |                 |
| OHCA/IHCA, (N, (%))                         | 31(44)/24(34)                         | 8(47)/2(12)                        | 23(43)/22(41)                          | 0.1             |
| <b>Initial rhythm at cardiac arrest</b>     |                                       |                                    |                                        |                 |
| VF/PEA/asystole/unknown, (N, (%))           | 14(19,7)/33(46,5)/11(15,5)/13(18,3)   | 1(6)/10(59)/0(0)/6(35)             | 13(24)/23(43)/11(20)/7(13)             | 0.1             |
| <b>Patient history</b>                      |                                       |                                    |                                        |                 |
| Hypertension, (N, (%))                      | 30(42)                                | 5(29)                              | 25(46)                                 | 0.2             |
| Type 2 Diabetes, (N, (%))                   | 12(17)                                | 2(12)                              | 10(19)                                 | 1.0             |
| Previous MI, (N, (%))                       | 13(18)                                | 3(18)                              | 10(19)                                 | 1.0             |
| Arrhythmias*, (N, (%))                      | 31(44)                                | 20(12)                             | 11(20)                                 | 0.7             |
| Valvular heart disease, (N, (%))            | 4(6)                                  | 1(6)                               | 3(6)                                   | 1.0             |
| CKD, (N, (%))                               | 24(34)                                | 20(12)                             | 4(7)                                   | 0.6             |
| ICD, (N, (%))                               | 4(6)                                  | 1(6)                               | 3(6)                                   | 1.0             |
| <b>Angiographic findings among patients</b> |                                       |                                    |                                        |                 |
| <b>Distribution of diseased vessels</b>     |                                       |                                    |                                        |                 |
| LM/LAD/Cx/RCA, (N, (%))                     | 21(30)/51(72)/35(49)/36(51)           | 5(29)/13(76)/9(53)/11(65)          | 16(30)/38(70)/26(48)/25(46)            | -               |
| <b>Infarct-related arteries</b>             |                                       |                                    |                                        |                 |
| LM/LAD/Cx/RCA, %                            | 17(24)/38(54)/22(31)/19(27)           | 4(24)/6(35)/6(35)/6(35)            | 13(24)/32(59)/16(30)/13(24)            | -               |
| <b>TIMI grade flow at baseline</b>          |                                       |                                    |                                        |                 |
| TIMI LM > 1, (N, (%))                       | 5(7)                                  | 1(6)                               | 4(7)                                   | 1.0             |
| TIMI LAD > 1, (N, (%))                      | 11(15)                                | 4(24)                              | 7(13)                                  | 0.2             |
| TIMI Cx > 1, (N, (%))                       | 6(8)                                  | 2(12)                              | 4(7)                                   | 1.0             |
| TIMI RCA > 1, (N, (%))                      | 9(13)                                 | 2(12)                              | 7(13)                                  | 1.0             |
| Multi-vessel CAD, (N, (%))                  | 27(38)                                | 6(35,3)                            | 21(39)                                 | 1.0             |
| 2 vessels, (N, (%))                         | 19(27)                                | 4(23,5)                            | 15(28)                                 | 1.0             |
| 3 vessels, (N, (%))                         | 8(11)                                 | 2(11,8)                            | 6(11)                                  | 1.0             |
| <b>Procedural data of patients</b>          |                                       |                                    |                                        |                 |
| Volume of contrast, mL                      | 180 ± 86                              | 182 ± 62                           | 179 ± 96                               | 0.5             |
| Radiation dose, mGy                         | 898 ± 893                             | 647 ± 404                          | 999 ± 1015                             | 0.2             |
| Respirator, (N, (%))                        | 62 (87)                               | 16 (94)                            | 46 (85)                                | 1.0             |
| Coronarography, (N, (%))                    | 60 (85)                               | 14 (82)                            | 46 (85)                                | 0.2             |
| Radial/femoral/unknown PCI access, (N, (%)) | 14(20)/51(72)/6(8)                    | 3(18)/12(71)/2(11)                 | 11(20)/39(72)/4(8)                     | 0.8             |
| PCI, (N, (%))                               | 56(79)                                | 11(65)                             | 45(83)                                 | 1.0             |
| Balloon angioplasty, (N, (%))               | 55(77)                                | 14(82)                             | 41(76)                                 | 0.3             |
| Stent, (N, (%))                             | 53(75)                                | 14(82)                             | 39(72)                                 | 0.2             |
| Thrombectomy, (N, (%))                      | 23(32)                                | 6(35)                              | 17(31)                                 | 0.5             |
| Glycoprotein IIb/IIIa inhibitors, (N, (%))  | 27(38)                                | 6(35)                              | 21(39)                                 | 0.7             |
| Endocavitary electrode, (N, (%))            | 23(32)                                | 2(12)                              | 21(39)                                 | 0.4             |
| IABP, (N, (%))                              | 15(21)                                | 6(35)                              | 9(17)                                  | 0.2             |
| <b>Pressor amines</b>                       |                                       |                                    |                                        |                 |
| Adrenaline, (N, (%))                        | 31(44)                                | 8(47)                              | 23(43)                                 | 0.7             |
| Noradrenaline, (N, (%))                     | 26(37)                                | 7(41)                              | 19(35)                                 | 1.0             |
| Dobutamine, (N, (%))                        | 19(27)                                | 4(24)                              | 15(28)                                 | 0.5             |

|                           |        |       |       |     |
|---------------------------|--------|-------|-------|-----|
| <b>Dopamine, (N, (%))</b> | 12(17) | 3(18) | 9(17) | 1.0 |
|---------------------------|--------|-------|-------|-----|

\*.LVEF: left ventricular ejection fraction; NSTEMI: non-ST segment elevation myocardial infarction; STEMI: ST segment elevation myocardial infarction; OHCA: out-of-hospital cardiac arrest; IHCA: in-hospital cardiac arrest; VF: ventricular fibrillation; PEA: pulseless electrical activity; MI: myocardial infarction; CKD: chronic kidney disease; ICD: implantable cardioverter defibrillator; LM: left main coronary artery; LAD: left anterior descending coronary artery; Cx: circumflex coronary artery; RCA: right coronary artery; TIMI: thrombolysis in myocardial ischemia; CAD: coronary artery disease; PCI: percutaneous coronary intervention; IABP: intra-aortic balloon pump.

**Table S2.** Patient characteristics and outcomes

| <b>Selected indices</b>                            | <b>Overall group<br/><i>n</i> = 48 (100%)</b> | <b>OHCA<br/><i>n</i> = 25 (52.1%)</b> | <b>IHCA<br/><i>n</i> = 23 (47.9%)</b> | <b><i>p</i>-value</b> |
|----------------------------------------------------|-----------------------------------------------|---------------------------------------|---------------------------------------|-----------------------|
| <b>Age, years</b>                                  | 72.6 ± 11.37                                  | 71.4 ± 11.57                          | 74 ± 11.27                            | 0.4                   |
| <b>Gender, males</b>                               | 27 (56%)                                      | 18 (72%)                              | 9 (39%)                               | <b>0.04</b>           |
| <b>LVEF, %</b>                                     | 26.8 ± 15.3                                   | 27.0 ± 13.9                           | 26.6 ± 16.7                           | 1.0                   |
| <b>Myocardial infarction type</b>                  |                                               |                                       |                                       |                       |
| <b>NSTEMI/STEMI/unknown, (N, (%))</b>              | 12(25)/26(54)/10(21)                          | 5(25)/16(64)/4(16)                    | 7(30)/10(43)/6(27)                    | 0.3                   |
| <b>Initial rhythm at cardiac arrest</b>            |                                               |                                       |                                       |                       |
| <b>VF/PEA/asystole/unknown, (N, (%))</b>           | 13(27)/22(46)/8(17)/5(10)                     | 6(24)/10(40)/5(20)/4(16)              | 7(30)/12(52)/3(13)/1(5)               | 0.5                   |
| <b>Patient history</b>                             |                                               |                                       |                                       |                       |
| <b>Hypertension, (N, (%))</b>                      | 28(58)                                        | 14(56)                                | 14(61)                                | 1.0                   |
| <b>Type 2 Diabetes, (N, (%))</b>                   | 12(25)                                        | 5(20)                                 | 7(30)                                 | 0.7                   |
| <b>Previous MI, (N, (%))</b>                       | 10(21)                                        | 5(20)                                 | 5(22)                                 | 1.0                   |
| <b>Arrhythmias<sup>a</sup>, (N, (%))</b>           | 11(23)                                        | 7(28)                                 | 4(17)                                 | 0.4                   |
| <b>Valvular heart disease, (N, (%))</b>            | 4(8)                                          | 3(12)                                 | 1(4)                                  | 0.6                   |
| <b>CKD, (N, (%))</b>                               | 5(10)                                         | 2(8)                                  | 3(13)                                 | 0.7                   |
| <b>ICD, (N, (%))</b>                               | 3(6)                                          | 1(4)                                  | 2(9)                                  | 0.6                   |
| <b>Angiographic findings among patients</b>        |                                               |                                       |                                       |                       |
| <b>Distribution of diseased vessels</b>            |                                               |                                       |                                       |                       |
| <b>LM/LAD/Cx/RCA, (N, (%))</b>                     | 13(27)/36(75)/23(48)/27(56)                   | 6(24)/16(64)/12(48)/13(52)            | 7(30)/20(87)/11(48)/14(61)            | -                     |
| <b>Infarct-related arteries</b>                    |                                               |                                       |                                       |                       |
| <b>LM/LAD/Cx/RCA, (N, (%))</b>                     | 10(21)/22(46)/10(21)/14(29)                   | 5(25)/9(36)/5(20)/8(32)               | 5(22)/13(57)/5(21)/6(26)              | -                     |
| <b>TIMI grade flow at baseline</b>                 |                                               |                                       |                                       |                       |
| <b>TIMI LM &gt; 1, (N, (%))</b>                    | 29(60)                                        | 14(56)                                | 15(65)                                | 0.1                   |
| <b>TIMI LAD &gt; 1, (N, (%))</b>                   | 16(33)                                        | 10(40)                                | 6(26)                                 | 0.3                   |
| <b>TIMI Cx &gt; 1, (N, (%))</b>                    | 24(50)                                        | 11(44)                                | 13(57)                                | 0.5                   |
| <b>TIMI RCA &gt; 1, (N, (%))</b>                   | 19(40)                                        | 8(32)                                 | 11(48)                                | 0.5                   |
| <b>Multivessel CAD, (N, (%))</b>                   | 15(31)                                        | 7(28)                                 | 8(35)                                 | 0.7                   |
| <b>2 vessels, (N, (%))</b>                         | 11(23)                                        | 6(24)                                 | 5(22)                                 | 1.0                   |
| <b>3 vessels, (N, (%))</b>                         | 4(8)                                          | 1(4)                                  | 3(13)                                 | 0.3                   |
| <b>Procedural data of patients</b>                 |                                               |                                       |                                       |                       |
| <b>Procedural data</b>                             |                                               |                                       |                                       |                       |
| <b>Volume of contrast, mL</b>                      | 206.7 ± 27.5                                  | 175.7 ± 86.4                          | 250 ± 149.8                           | 0.5                   |
| <b>Radiation dose, mGy</b>                         | 1130.8 ± 1150.0                               | 707.5 ± 252.3                         | 1796 ± 1672.2                         | <b>0.03</b>           |
| <b>Respirator, (N, (%))</b>                        | 85                                            | 88                                    | 83                                    | 0.5                   |
| <b>Radial/femoral/unknown PCI access, (N, (%))</b> | 10(21)/33(69)/5(10)                           | 2(8)/19(76)/4(16)                     | 8(35)/14(61)/1(4)                     | <b>0.047</b>          |
| <b>PCI, (N, (%))</b>                               | 45(94)                                        | 23(92)                                | 22(96)                                | 1.0                   |
| <b>Balloon angioplasty, (N, (%))</b>               | 39(81)                                        | 19(76)                                | 20(87)                                | 0.1                   |
| <b>Stent, (N, (%))</b>                             | 36(75)                                        | 19(76)                                | 17(74)                                | 1.0                   |
| <b>Thrombectomy, (N, (%))</b>                      | 13(27)                                        | 5(20)                                 | 8(35)                                 | 0.3                   |
| <b>GlycoproteinIIb/IIIa inhibitors, (N, (%))</b>   | 18(38)                                        | 9(36)                                 | 9(39)                                 | 0.8                   |

|                                         |        |        |        |             |
|-----------------------------------------|--------|--------|--------|-------------|
| <b>Endocavitary electrode, (N, (%))</b> | 16(33) | 5(20)  | 11(48) | 0.1         |
| <b>IABP, (N, (%))</b>                   | 9(19)  | 5(20)  | 4(17)  | 1.0         |
| <b>Pressoramines</b>                    |        |        |        |             |
| <b>Adrenaline, (N, (%))</b>             | 21(44) | 9(36)  | 12(52) | 0.5         |
| <b>Noradrenaline, (N, (%))</b>          | 22(46) | 12(48) | 10(43) | 0.3         |
| <b>Dobutamine, (N, (%))</b>             | 18(38) | 9(36)  | 9(39)  | 0.7         |
| <b>Dopamine, (N, (%))</b>               | 13(27) | 10(40) | 3(13)  | <b>0.01</b> |

\*.Data are shown as mean  $\pm$  standard deviation (SD) or proportions (%). *P*-values below 0.05 were marked in bold.

<sup>a</sup> Arrhythmias include: atrial fibrillation, 3rd degree cardiac block and left bundle branch block.

LVEF: left ventricular ejection fraction; NSTEMI: non-ST segment elevation myocardial infarction; STEMI: ST segment elevation myocardial infarction; OHCA: out-of-hospital cardiac arrest; IHCA: in-hospital cardiac arrest; VF: ventricular fibrillation; PEA: pulseless electrical activity; MI: myocardial infarction; CKD: chronic kidney disease; ICD: implantable cardioverter defibrillator; LM: left main coronary artery; LAD: left anterior descending coronary artery; Cx: circumflex coronary artery; RCA: right coronary artery; TIMI: thrombolysis in myocardial ischemia; CAD: coronary artery disease; PCI: percutaneous coronary intervention; IABP: intra-aortic balloon pump.

Table S3. Laboratory data

| Selected indices                        | Overall group<br><i>n</i> = 48 (100%) | OHCA<br><i>n</i> = 25 (52.1%) | IHCA<br><i>n</i> = 23 (47.9%) | <i>p</i> -value |
|-----------------------------------------|---------------------------------------|-------------------------------|-------------------------------|-----------------|
| <b>aPTT, s</b>                          | 83.9 $\pm$ 70.3                       | 85.8 $\pm$ 68.3               | 81.3 $\pm$ 75.4               | 0.7             |
| <b>INR</b>                              | 1.5 $\pm$ 1.1                         | 1.6 $\pm$ 1.3                 | 1.4 $\pm$ 0.7                 | 1.0             |
| <b>Prothrombin time, s</b>              | 17.3 $\pm$ 11.8                       | 18.3 $\pm$ 14.5               | 16.1 $\pm$ 7.5                | 0.9             |
| <b>Hemoglobin, g/dL</b>                 | 12.4 $\pm$ 2.3                        | 12.6 $\pm$ 2.3                | 12.1 $\pm$ 2.3                | 0.6             |
| <b>Erythrocytes, x10<sup>6</sup>/μL</b> | 4.1 $\pm$ 0.7                         | 4.0 $\pm$ 0.7                 | 4.2 $\pm$ 0.6                 | 0.5             |
| <b>Platelets, x10<sup>3</sup>/μL</b>    | 193.7 $\pm$ 75.6                      | 168.0 $\pm$ 65.5              | 223.7 $\pm$ 77.1              | <b>0.02</b>     |
| <b>Creatinine, mg/dL</b>                | 1.8 $\pm$ 1.2                         | 1.79 $\pm$ 1.1                | 1.82 $\pm$ 1.4                | 0.4             |
| <b>eGFR, mL/min/1.73 m<sup>2</sup></b>  | 47.0 $\pm$ 23.4                       | 45.5 $\pm$ 16.8               | 48.6 $\pm$ 28.9               | 0.7             |
| <b>Sodium, mmol/L</b>                   | 138.6 $\pm$ 4.9                       | 139.2 $\pm$ 5.6               | 138 $\pm$ 4.2                 | 0.3             |
| <b>Potassium, mmol/L</b>                | 4.5 $\pm$ 0.9                         | 4.3 $\pm$ 0.8                 | 4.7 $\pm$ 1.0                 | 0.2             |

\*aPTT: activated partial thromboplastin time; INR: international normalized ratio; eGFR: estimated glomerular filtration rate.

Table S4. Univariate logistic regression analysis of survival predictors with laboratory parameters as dichotomous variables

| Predictor                                     | Odds ratio | 95% Confidence Interval | <i>p</i> -value |
|-----------------------------------------------|------------|-------------------------|-----------------|
| <b>Gender, male vs. female</b>                | 1.65       | 0.70-3.89               | 0.3             |
| <b>Prothrombin time &gt;15 s</b>              | 1.94       | 0.60-6.28               | 0.3             |
| <b>Hemoglobin &lt; 10 g/dL</b>                | 1.53       | 0.41-5.73               | 0.5             |
| <b>Platelets &lt; 100x10<sup>3</sup>/μL</b>   | 2.24       | 0.57-8.76               | 0.3             |
| <b>Creatinine &gt; 1.2 mg/dL</b>              | 1.50       | 0.51-4.42               | 0.5             |
| <b>eGFR &lt; 60 mL/min/1.73 m<sup>2</sup></b> | 1.65       | 0.56-4.85               | 0.4             |
| <b>Sodium &lt; 135 mmol/L</b>                 | 0.92       | 0.19-4.37               | 0.9             |
| <b>Potassium &gt; 5.0 mmol/La</b>             | 4.61       | 1.41-15.05              | <b>0.01</b>     |
| <b>Glucose &gt; 180 mg/dL</b>                 | 0.55       | 0.12-2.60               | 0.5             |
| <b>CRP &gt; 5 mg/dL</b>                       | 1.41       | 0.38-5.24               | 0.6             |
| <b>pH &lt; 7.35</b>                           | 1.04       | 0.30-3.58               | 1.0             |
| <b>pH &lt; 7.15</b>                           | 0.75       | 0.28-1.99               | 0.6             |
| <b>pCO<sub>2</sub> &gt; 45 mmHg</b>           | 1.33       | 0.50-3.53               | 0.6             |

<sup>a</sup>Age- and sex-adjusted ORs and *p*-values.
